# Supplementary material
Source: publisher figshare collection journal article supplement (https://acs.figshare.com/ndownloader/files/4190719)

Some of the predictions show almost the same trends (i.e. probable systematic deviations from the related gas viscosity experimental values [36]) as follows:

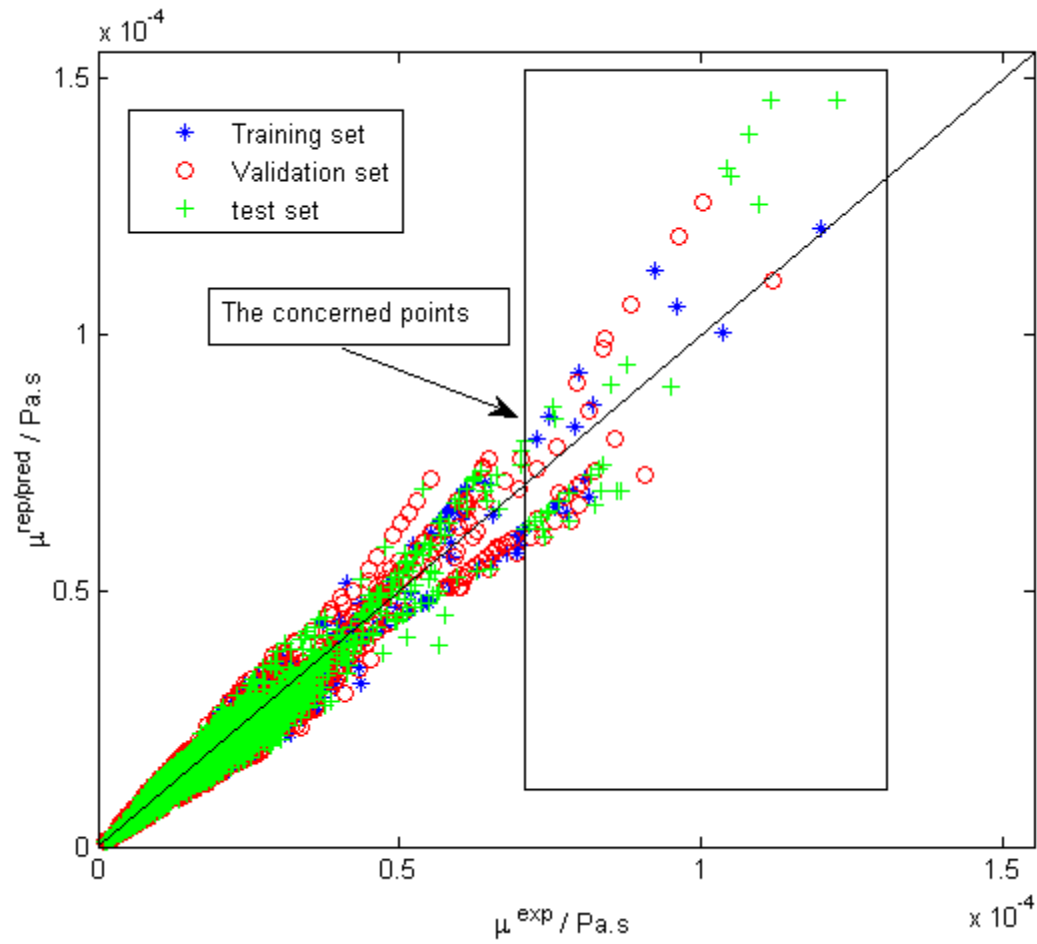

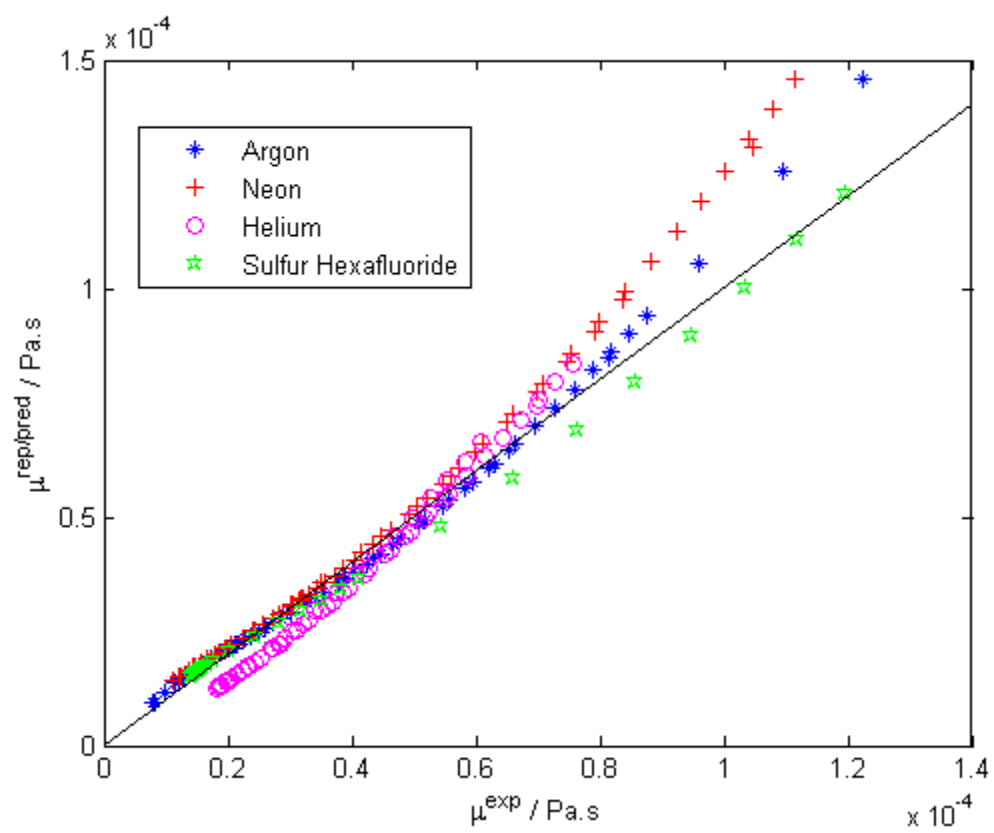

Supplement: Supplementary file 1 [file 4190719]
